# Supplementary material for: Construction and Analysis of Protein-Protein Interaction Network of Heroin Use Disorder
Source: PubMed Central journal article supplement (PMC6428805; doi:10.1038/s41598-019-41552-z), 2019-03-21

## Supplementary Information

### Construction and Analysis of Protein-Protein Interaction Network of

### Heroin Use Disorder

Shaw-Ji Chen<sup>1,2</sup>, Ding-Lieh Liao<sup>3</sup>, Chia-Hsiang Chen<sup>4</sup>,

Tse-Yi Wang<sup>5</sup>, Kuang-Chi Chen<sup>5\*</sup>

<sup>1</sup> Department of Medicine, Mackay Medical College, New Taipei City, Taiwan,

<sup>2</sup> Department of Psychiatry, Mackay Memorial Hospital, Taitung Branch, Taiwan

<sup>3</sup> Bali Psychiatric Center, Department of Health, Executive Yuan, New Taipei, Taiwan

<sup>4</sup> Department of Psychiatry, Chang Gung Memorial Hospital at Linkou and Chang

Gung University School of Medicine, Taoyuan, Taiwan

<sup>5</sup>Department of Medical Informatics, Tzu Chi University, Hualien, Taiwan

Please address correspondence to:

Kuang-Chi Chen Ph.D.

Dept. of Medical Informatics, Tzu Chi University, Hualien, Taiwan, R.O.C.

Phone: 886-3- 8565301 # 2390

Fax: 886-3- 8579409

E-mail: [chichen6@mail.tcu.edu.tw](mailto:chichen6@mail.tcu.edu.tw)

## **Legend of Tables**

Table S1. The seed proteins associated with HUD

Table S2. The proteins in PPI network extracted from STRING database associated with HUD

Table S3. The topological measurements of PPI network

Table S4. The proteins in the PPI network (with co-expression) extracted from STRING database associated with HUD

Table S5. The topological measurements of PPI network (with co-expression)

Table S6. Top 25 nodes with high degree and their respective BC and CC

Table S7. Top 25 nodes with high BC and their respective  $k$  and CC

Table S8. The proteins in the backbone network (with co-expression)

Table S9. The proteins in the 2<sup>nd</sup> extended PPI network (with co-expression) involved in the KEGG pathways of alcoholism, amphetamine addiction, and cocaine addition

Table S10. The miRNA targeting genes by stress-induced

Table S11. The miRNA-disease associations in HMDD v3.0

## Legend of Figures

Figure S1. The PPI network (with co-expression)

Figure S2. The backbone network (with co-expression)

Figure S3. The 13-protein-subnetwork of the two backbones

Figure S4. The 2<sup>nd</sup> extended PPI network (with co-expression)

\*The red ones are nodes in amphetamine addiction pathway

+The blue ones are nodes in cocaine addiction pathway

#The green ones are nodes in alcoholism pathway

Figure S5. The KEGG pathways of alcoholism

Figure S6. The KEGG pathways of amphetamine addiction

Figure S7. The KEGG pathways of cocaine addiction

Table S1. The seed proteins associated with HUD

| Label | Name   | Description                                                               |
|-------|--------|---------------------------------------------------------------------------|
| 1     | AUTS2  | autism susceptibility candidate 2                                         |
| 2     | CD74   | CD74 molecule, major histocompatibility complex, class II invariant chain |
| 3     | CEBPB  | CCAAT/enhancer binding protein (C/EBP), beta                              |
| 4     | CEBPG  | CCAAT/enhancer binding protein (C/EBP), gamma                             |
| 5     | ENO2   | enolase 2 (gamma, neuronal)                                               |
| 6     | HAT1   | histone acetyltransferase 1                                               |
| 7     | IMPDH2 | IMP (inosine 5'-monophosphate) dehydrogenase 2                            |
| 8     | JUN    | jun proto-oncogene                                                        |
| 9     | MBD1   | methyl-CpG binding domain protein 1                                       |
| 10    | PDK1   | pyruvate dehydrogenase kinase, isozyme 1                                  |
| 11    | PRKCB  | protein kinase C, beta                                                    |
| 12    | RASA1  | RAS p21 protein activator                                                 |
| 13    | RGS3   | regulator of G-protein signaling 3                                        |

Table S2. The proteins in the PPI network extracted from STRING database associated with HUD

| Label | Names           | Description                                                                                               |
|-------|-----------------|-----------------------------------------------------------------------------------------------------------|
| 1     | ARHGAP35        | Rho GTPase activating protein 35                                                                          |
| 2     | ATF1            | Activating transcription factor 1                                                                         |
| 3     | ATF2            | Activating transcription factor 2                                                                         |
| 4     | ATF3            | Activating transcription factor 3                                                                         |
| 5     | ATIC            | 5-aminoimidazole-4-carboxamide ribonucleotide formyltransferase/IMP cyclohydrolase                        |
| 6     | AURKB           | Aurora kinase B                                                                                           |
| 7     | BATF3           | Basic leucine zipper transcription factor, ATF-like 3; AP-1 family transcription factor that controls the |
| 8     | BPGM            | 2,3-bisphosphoglycerate mutase                                                                            |
| 9     | CD74            | CD74 molecule, major histocompatibility complex, class II invariant chain                                 |
| 10    | CEBPA           | CCAAT/enhancer binding protein (C/EBP), alpha                                                             |
| 11    | CEBPB           | CCAAT/enhancer binding protein (C/EBP), betaplays essential and redundant functions with CE [...]         |
| 12    | CEBPD           | CCAAT/enhancer binding protein (C/EBP), delta heterodimer with CEBPB (PubMed:1741402)                     |
| 13    | CEBPG           | CCAAT/enhancer binding protein (C/EBP), gamma promoter                                                    |
| 14    | CHUK            | Conserved helix-loop-helix ubiquitous kinase                                                              |
| 15    | COPS5           | COP9 constitutive photomorphogenic homolog subunit 5 (Arabidopsis)                                        |
| 16    | CREB1           | cAMP responsive element binding protein 1                                                                 |
| 17    | CREBBP          | CREB binding protein                                                                                      |
| 18    | CSK             | C-src tyrosine kinase                                                                                     |
| 19    | CTSL1           | Cathepsin L1; Important for the overall degradation of proteins in lysosomes                              |
| 20    | DLAT            | Dihydrolipoamide S-acetyltransferase                                                                      |
| 21    | DOK1            | Docking protein 1, 62kDa (downstream of tyrosine kinase 1)                                                |
| 22    | DOK2            | Docking protein 2, 56kDa                                                                                  |
| 23    | DUSP1           | Dual specificity phosphatase 1                                                                            |
| 24    | DVL2            | Dishevelled, dsh homolog 2                                                                                |
| 25    | EGFR            | Epidermal growth factor receptor                                                                          |
| 26    | EGR1            | Early growth response 1                                                                                   |
| 27    | ENO2            | Enolase 2 (gamma, neuronal)                                                                               |
| 28    | ENO3            | Enolase 3 (beta, muscle)                                                                                  |
| 29    | ENSG00000250741 | NT5C1B-RDH14 readthroug                                                                                   |
| 30    | EP300           | E1A binding protein p300                                                                                  |
| 31    | EPHB2           | EPH receptor B2                                                                                           |
| 32    | EPHB3           | EPH receptor B3                                                                                           |
| 33    | ESR1            | Estrogen receptor 1                                                                                       |

|    |          |                                                                            |
|----|----------|----------------------------------------------------------------------------|
| 34 | ETS1     | V-ets erythroblastosis virus E26 oncogene homolog 1 (avian);               |
| 35 | ETS2     | V-ets erythroblastosis virus E26 oncogene homolog 2 (avian)                |
| 36 | FOS      | FBJ murine osteosarcoma viral oncogene homolog                             |
| 37 | FOSB     | FBJ murine osteosarcoma viral oncogene homolog B                           |
| 38 | FOSL1    | FOS-like antigen 1                                                         |
| 39 | FOSL2    | FOS-like antigen 2                                                         |
| 40 | GATA2    | GATA binding protein 2                                                     |
| 41 | GMPR     | Guanosine monophosphate reductase                                          |
| 42 | GMPR2    | Guanosine monophosphate reductase 2                                        |
| 43 | GMPS     | Guanine monphosphate synthetase;                                           |
| 44 | GNA11    | Guanine nucleotide binding protein (G protein), alpha 11 (Gq class)        |
| 45 | GNA14    | Guanine nucleotide binding protein (G protein), alpha 14                   |
| 46 | GNA15    | Guanine nucleotide binding protein (G protein), alpha 15 (Gq class)        |
| 47 | GNAQ     | Guanine nucleotide binding protein (G protein), q polypeptide              |
| 48 | GNB2L1   | Guanine nucleotide binding protein (G protein), beta polypeptide 2-like 1  |
| 49 | GSK3B    | Glycogen synthase kinase 3 beta                                            |
| 50 | GTF2B    | General transcription factor IIB                                           |
| 51 | HAT1     | Histone acetyltransferase 1                                                |
| 52 | HCK      | Hemopoietic cell kinase                                                    |
| 53 | HLA-DMB  | Major histocompatibility complex, class II, DM beta                        |
| 54 | HLA-DPA1 | Major histocompatibility complex, class II, DP alpha 1                     |
| 55 | HLA-DRA  | Major histocompatibility complex, class II, DR alpha                       |
| 56 | HLA-DRB1 | Major histocompatibility complex, class II, DR beta 1                      |
| 57 | HLA-DRB5 | Major histocompatibility complex, class II, DR beta 5                      |
| 58 | HPRT1    | Hypoxanthine phosphoribosyltransferase 1                                   |
| 59 | HRAS     | v-Ha-ras Harvey rat sarcoma viral oncogene homolog                         |
| 60 | IKBKB    | Inhibitor of kappa light polypeptide gene enhancer in B-cells, kinase beta |
| 61 | IMPDH1   | IMP (inosine 5'-monophosphate) dehydrogenase 1                             |
| 62 | IMPDH2   | IMP (inosine 5'-monophosphate) dehydrogenase 2                             |
| 63 | ITPA     | Inosine triphosphatase (nucleoside triphosphate pyrophosphatase)           |
| 64 | JDP2     | Jun dimerization protein 2                                                 |
| 65 | JUN      | Jun proto-oncogene                                                         |
| 66 | KAT2B    | K(lysine) acetyltransferase 2                                              |
| 67 | LCK      | Lymphocyte-specific protein tyrosine kinase                                |
| 68 | MAFB     | V-maf musculoaponeurotic fibrosarcoma oncogene homolog B (avian)           |
| 69 | MAPK1    | Mitogen-activated protein kinase 1                                         |

|     |         |                                                                                                   |
|-----|---------|---------------------------------------------------------------------------------------------------|
| 70  | MAPK10  | Mitogen-activated protein kinase 10                                                               |
| 71  | MAPK11  | Mitogen-activated protein kinase 11                                                               |
| 72  | MAPK14  | Mitogen-activated protein kinase 14                                                               |
| 73  | MAPK3   | Mitogen-activated protein kinase 3                                                                |
| 74  | MAPK8   | Mitogen-activated protein kinase 8                                                                |
| 75  | MAPK9   | Mitogen-activated protein kinase 9                                                                |
| 76  | MYB     | V-myb myeloblastosis viral oncogene homolog (avian)                                               |
| 77  | NFATC2  | Nuclear factor of activated T-cells, cytoplasmic, calcineurin-dependent 2                         |
| 78  | NFE2L2  | Nuclear factor (erythroid-derived 2)-like 2                                                       |
| 79  | NR3C1   | Nuclear receptor subfamily 3, group C, member 1 (glucocorticoid receptor)                         |
| 80  | NT5C1A  | 5'-nucleotidase, cytosolic IA                                                                     |
| 81  | NT5C2   | 5'-nucleotidase, cytosolic II                                                                     |
| 82  | NT5E    | 5'-nucleotidase, ecto (CD73)                                                                      |
| 83  | PCK1    | Phosphoenolpyruvate carboxykinase 1 (soluble)                                                     |
| 84  | PDGFRB  | Platelet-derived growth factor receptor, beta polypeptide                                         |
| 85  | PDHA1   | Pyruvate dehydrogenase (lipoamide) alpha 1                                                        |
| 86  | PDHB    | Pyruvate dehydrogenase (lipoamide) beta                                                           |
| 87  | PDHX    | Pyruvate dehydrogenase complex, component X                                                       |
| 88  | PDK1    | Pyruvate dehydrogenase kinase, isozyme 1                                                          |
| 89  | PDPK1   | 3-phosphoinositide dependent protein kinase-1                                                     |
| 90  | PGAM1   | Phosphoglycerate mutase 1 (brain)                                                                 |
| 91  | PGAM2   | Phosphoglycerate mutase 2 (muscle)                                                                |
| 92  | PGAM4   | Phosphoglycerate mutase family member 4                                                           |
| 93  | PKLR    | Pyruvate kinase, liver and RBC;                                                                   |
| 94  | PKM     | Pyruvate kinase, muscle                                                                           |
| 95  | PRKCB   | Protein kinase C, beta                                                                            |
| 96  | PRKCD   | Protein kinase C, delta                                                                           |
| 97  | RASA1   | RAS p21 protein activator (GTPase activating protein) 1                                           |
| 98  | RBBP4   | Retinoblastoma binding protein 4                                                                  |
| 99  | RBBP7   | Retinoblastoma binding protein 7                                                                  |
| 100 | RELA    | V-rel reticuloendotheliosis viral oncogene homolog A (avian)                                      |
| 101 | RGS3    | Regulator of G-protein signaling 3                                                                |
| 102 | RPS6KA1 | Ribosomal protein S6 kinase, 90kDa, polypeptide 1                                                 |
| 103 | SHC1    | SHC (Src homology 2 domain containing) transforming protein 1                                     |
| 104 | SMAD3   | SMAD family member 3                                                                              |
| 105 | SMARCA4 | SWI/SNF related, matrix associated, actin dependent regulator of chromatin, subfamily a, member 4 |
| 106 | SMARCB1 | SWI/SNF related, matrix associated, actin dependent regulator of                                  |

---

|     |         |                                                                                                   |
|-----|---------|---------------------------------------------------------------------------------------------------|
|     |         | chromatin, subfamily b, member 1                                                                  |
| 107 | SMARCD1 | SWI/SNF related, matrix associated, actin dependent regulator of chromatin, subfamily d, member 1 |
| 108 | SP1     | Sp1 transcription factor                                                                          |
| 109 | SRC     | V-src sarcoma (Schmidt-Ruppin A-2) viral oncogene homolog (avian)                                 |
| 110 | STAT4   | Signal transducer and activator of transcription 4                                                |
| 111 | YES1    | V-yes-1 Yamaguchi sarcoma viral oncogene homolog 1                                                |

---

---

|      |       |                                   |
|------|-------|-----------------------------------|
| seed | AUTS2 | Autism susceptibility candidate 2 |
|------|-------|-----------------------------------|

---

---

|      |      |                                     |
|------|------|-------------------------------------|
| seed | MBD1 | methyl-CpG binding domain protein 1 |
|------|------|-------------------------------------|

---



Table S4. The proteins in the PPI network (with co-expression) extracted from STRING database associated with HUD

| Label | Names           | Description                                                                                       |
|-------|-----------------|---------------------------------------------------------------------------------------------------|
| 1     | ARHGAP35        | Rho GTPase activating protein 35                                                                  |
| 2     | ATF2            | Activating transcription factor 2                                                                 |
| 3     | ATF3            | Activating transcription factor 3                                                                 |
| 4     | ATIC            | 5-aminoimidazole-4-carboxamide ribonucleotide formyltransferase/IMP cyclohydrolase                |
| 5     | BATF3           | Basic leucine zipper transcription factor, ATF-like 3                                             |
| 6     | BPGM            | 2,3-bisphosphoglycerate mutase                                                                    |
| 7     | CAD             | Carbamoyl-phosphate synthetase 2, aspartate transcarbamylase, and dihydroorotase                  |
| 8     | CD74            | CD74 molecule, major histocompatibility complex, class II invariant chain                         |
| 9     | CEBPA           | CCAAT/enhancer binding protein (C/EBP), alpha                                                     |
| 10    | CEBPB           | CCAAT/enhancer binding protein (C/EBP), betaplays essential and redundant functions with CE [...] |
| 11    | CEBPD           | CCAAT/enhancer binding protein (C/EBP), delta heterodimer with CEBPB (PubMed:1741402)             |
| 12    | CEBPG           | CCAAT/enhancer binding protein (C/EBP), gamma promoter                                            |
| 13    | CHUK            | Conserved helix-loop-helix ubiquitous kinase                                                      |
| 14    | COPS5           | COP9 constitutive photomorphogenic homolog subunit 5 (Arabidopsis)                                |
| 15    | CPS1            | Carbamoyl-phosphate synthase 1                                                                    |
| 16    | CREB1           | cAMP responsive element binding protein 1                                                         |
| 17    | CREBBP          | CREB binding protein                                                                              |
| 18    | CTPS1           | CTP synthase 1                                                                                    |
| 19    | CTPS2           | CTP synthase 2                                                                                    |
| 20    | CTSL1           | Cathepsin L1; Important for the overall degradation of proteins in lysosomes                      |
| 21    | DLAT            | Dihydrolipoamide S-acetyltransferase                                                              |
| 22    | DOK1            | Docking protein 1, 62kDa (downstream of tyrosine kinase 1)                                        |
| 23    | DOK2            | Docking protein 2, 56kDa                                                                          |
| 24    | DUSP1           | Dual specificity phosphatase 1                                                                    |
| 25    | DVL2            | Dishevelled, dsh homolog 2                                                                        |
| 26    | EGR1            | Early growth response 1                                                                           |
| 27    | ENO2            | Enolase 2 (gamma, neuronal)                                                                       |
| 28    | ENO3            | Enolase 3 (beta, muscle)                                                                          |
| 29    | ENSG00000250741 | NT5C1B-RDH14 readthroug                                                                           |
| 30    | EP300           | E1A binding protein p300                                                                          |
| 31    | EPHB2           | EPH receptor B2                                                                                   |
| 32    | EPHB3           | EPH receptor B3                                                                                   |

|    |          |                                                                            |
|----|----------|----------------------------------------------------------------------------|
| 33 | ESR1     | Estrogen receptor 1                                                        |
| 34 | ETS1     | V-ets erythroblastosis virus E26 oncogene homolog 1 (avian);               |
| 35 | ETS2     | V-ets erythroblastosis virus E26 oncogene homolog 2 (avian)                |
| 36 | FOS      | FBJ murine osteosarcoma viral oncogene homolog                             |
| 37 | FOSB     | FBJ murine osteosarcoma viral oncogene homolog B                           |
| 38 | FOSL1    | FOS-like antigen 1                                                         |
| 39 | FOSL2    | FOS-like antigen 2                                                         |
| 40 | GAPDH    | Glyceraldehyde-3-phosphate dehydrogenase                                   |
| 41 | GAPDHS   | Glyceraldehyde-3-phosphate dehydrogenase, spermatogenic                    |
| 42 | GMPR     | Guanosine monophosphate reductase                                          |
| 43 | GMPR2    | Guanosine monophosphate reductase 2                                        |
| 44 | GMPS     | Guanine monphosphate synthetase;                                           |
| 45 | GNA11    | Guanine nucleotide binding protein (G protein), alpha 11 (Gq class)        |
| 46 | GNA14    | Guanine nucleotide binding protein (G protein), alpha 14                   |
| 47 | GNA15    | Guanine nucleotide binding protein (G protein), alpha 15 (Gq class)        |
| 48 | GNAQ     | Guanine nucleotide binding protein (G protein), q polypeptide              |
| 49 | GPI      | Glucose-6-phosphate isomerase                                              |
| 50 | GSK3B    | Glycogen synthase kinase 3 beta                                            |
| 51 | HAT1     | Histone acetyltransferase 1                                                |
| 52 | HLA-DMA  | Hemopoietic cell kinase                                                    |
| 53 | HLA-DMB  | Major histocompatibility complex, class II, DM beta                        |
| 54 | HLA-DPA1 | Major histocompatibility complex, class II, DP alpha 1                     |
| 55 | HLA-DPB1 | Major histocompatibility complex, class II, DR alpha                       |
| 56 | HLA-DQA2 | Major histocompatibility complex, class II, DR beta 1                      |
| 57 | HLA-DRA  | Major histocompatibility complex, class II, DR beta 5                      |
| 58 | HLA-DRB1 | Major histocompatibility complex, class II, DR beta 1                      |
| 59 | HLA-DRB5 | Major histocompatibility complex, class II, DR beta 5                      |
| 60 | HPRT1    | Hypoxanthine phosphoribosyltransferase 1                                   |
| 61 | HRAS     | v-Ha-ras Harvey rat sarcoma viral oncogene homolog                         |
| 62 | IKBKB    | Inhibitor of kappa light polypeptide gene enhancer in B-cells, kinase beta |
| 63 | IMPDH1   | IMP (inosine 5'-monophosphate) dehydrogenase 1                             |
| 64 | IMPDH2   | IMP (inosine 5'-monophosphate) dehydrogenase 2                             |
| 65 | ITPA     | Inosine triphosphatase (nucleoside triphosphate pyrophosphatase)           |
| 66 | JDP2     | Jun dimerization protein 2                                                 |
| 67 | JUN      | Jun proto-oncogene L                                                       |
| 68 | JUNB     | V-maf musculoaponeurotic fibrosarcoma oncogene homolog B (avian)           |
| 69 | KAT2B    | K(lysine) acetyltransferase 2                                              |

|     |         |                                                                                                   |
|-----|---------|---------------------------------------------------------------------------------------------------|
| 70  | MAFB    | V-maf musculoaponeurotic fibrosarcoma oncogene homolog B (avian)                                  |
| 71  | MAPK1   | Mitogen-activated protein kinase 10                                                               |
| 72  | MAPK10  | Mitogen-activated protein kinase 11                                                               |
| 73  | MAPK11  | Mitogen-activated protein kinase 14                                                               |
| 74  | MAPK14  | Mitogen-activated protein kinase 3                                                                |
| 75  | MAPK8   | Mitogen-activated protein kinase 8                                                                |
| 76  | MAPK9   | Mitogen-activated protein kinase 9                                                                |
| 77  | MYB     | V-myb myeloblastosis viral oncogene homolog (avian)                                               |
| 78  | NFATC2  | Nuclear factor (erythroid-derived 2)-like 2                                                       |
| 79  | NR3C1   | Nuclear receptor subfamily 3, group C, member 1 (glucocorticoid receptor)                         |
| 80  | NT5C1A  | 5'-nucleotidase, cytosolic IA                                                                     |
| 81  | NT5C2   | 5'-nucleotidase, cytosolic II                                                                     |
| 82  | NT5E    | 5'-nucleotidase, ecto (CD73)                                                                      |
| 83  | PCK1    | Phosphoenolpyruvate carboxykinase 1 (soluble)                                                     |
| 84  | PDHA1   | Pyruvate dehydrogenase (lipoamide) alpha 1                                                        |
| 85  | PDHB    | Pyruvate dehydrogenase (lipoamide) beta                                                           |
| 86  | PDHX    | Pyruvate dehydrogenase complex, component X                                                       |
| 87  | PDK1    | Pyruvate dehydrogenase kinase, isozyme 1                                                          |
| 88  | PDPK1   | 3-phosphoinositide dependent protein kinase-1                                                     |
| 89  | PGAM1   | Phosphoglycerate mutase 1 (brain)                                                                 |
| 90  | PGAM2   | Phosphoglycerate mutase 2 (muscle)                                                                |
| 91  | PGAM4   | Phosphoglycerate mutase family member 4                                                           |
| 92  | PGK1    | Phosphoglycerate kinase 1                                                                         |
| 93  | PGK2    | Phosphoglycerate kinase 2                                                                         |
| 94  | PKLR    | Pyruvate kinase, liver and RBC                                                                    |
| 95  | PKM     | Pyruvate kinase, muscle                                                                           |
| 96  | PNMAL2  | Paraneoplastic Ma antigen family-like 2                                                           |
| 97  | PRKCB   | Protein kinase C, beta                                                                            |
| 98  | PRKCD   | Protein kinase C, delta                                                                           |
| 99  | RASA1   | RAS p21 protein activator (GTPase activating protein) 1                                           |
| 100 | RBBP4   | Retinoblastoma binding protein 4                                                                  |
| 101 | RBBP7   | Retinoblastoma binding protein 7                                                                  |
| 102 | RELA    | V-rel reticuloendotheliosis viral oncogene homolog A (avian)                                      |
| 103 | RGS3    | Regulator of G-protein signaling 3                                                                |
| 104 | SMARCA4 | SWI/SNF related, matrix associated, actin dependent regulator of chromatin, subfamily a, member 4 |
| 105 | SMARCB1 | SWI/SNF related, matrix associated, actin dependent regulator of                                  |

---

|     |         |                                                                                                   |
|-----|---------|---------------------------------------------------------------------------------------------------|
|     |         | chromatin, subfamily b, member 1                                                                  |
| 106 | SMARCD1 | SWI/SNF related, matrix associated, actin dependent regulator of chromatin, subfamily d, member 1 |
| 107 | SP1     | Sp1 transcription factor                                                                          |
| 108 | SRC     | V-src sarcoma (Schmidt-Ruppin A-2) viral oncogene homolog (avian)                                 |
| 109 | STAT4   | Signal transducer and activator of transcription 4                                                |
| 110 | TPI1    | Triosephosphate isomerase 1                                                                       |
| 111 | YES1    | V-yes-1 Yamaguchi sarcoma viral oncogene homolog 1                                                |

---

|      |       |                                     |
|------|-------|-------------------------------------|
| seed | AUTS2 | Autism susceptibility candidate 2   |
| seed | MBD1  | methyl-CpG binding domain protein 1 |

---

Table S6. Top 25 nodes with high degree and their respective BC and CC

| Label | Name          | Degree    | Betweenness centrality | Closeness centrality |
|-------|---------------|-----------|------------------------|----------------------|
| 1*    | <b>JUN</b>    | <b>43</b> | <b>0.138335165</b>     | <b>0.436507937</b>   |
| 2     | <b>MAPK14</b> | <b>32</b> | <b>0.083166142</b>     | <b>0.433070866</b>   |
| 3     | FOS           | 26        | 0.059760577            | 0.415094340          |
| 4     | LCK           | 26        | 0.058523406            | 0.371621622          |
| 5     | <b>RELA</b>   | <b>25</b> | <b>0.069572515</b>     | <b>0.421455939</b>   |
| 6     | MAPK1         | 25        | 0.046624799            | 0.423076923          |
| 7     | <b>CREBBP</b> | <b>24</b> | <b>0.163843625</b>     | <b>0.452674897</b>   |
| 8     | ATF2          | 24        | 0.022118131            | 0.402930403          |
| 9     | EP300         | 23        | 0.129821489            | 0.443548387          |
| 10    | MAPK8         | 22        | 0.044774657            | 0.418250951          |
| 11    | HRAS          | 22        | 0.027715087            | 0.358306189          |
| 12*   | RASA1         | 21        | 0.037173088            | 0.351437700          |
| 13    | SRC           | 21        | 0.023429190            | 0.360655738          |
| 14    | MAPK3         | 19        | 0.019268371            | 0.408921933          |
| 15    | SHC1          | 18        | 0.030403520            | 0.390070922          |
| 16    | CREB1         | 17        | 0.128192989            | 0.433070866          |
| 17    | YES1          | 17        | 0.015116120            | 0.350318471          |
| 18    | MAPK11        | 17        | 0.014441917            | 0.400000000          |
| 19    | SP1           | 17        | 0.007943959            | 0.392857143          |
| 20    | CSK           | 16        | 0.056993119            | 0.385964912          |
| 21    | ESR1          | 16        | 0.023134181            | 0.395683453          |
| 22*   | CEBPB         | 15        | 0.023990476            | 0.384615385          |
| 23    | SMAD3         | 15        | 0.012296350            | 0.384615385          |
| 24    | NR3C1         | 14        | 0.002076446            | 0.381944444          |
| 25    | ITPA          | 13        | 0.181820962            | 0.250000000          |

Note: The bold ones have both large degree and high BC

The asterisk ones are the seed proteins (3 nodes: JUN, RASA1, CEBPB)

Table S7. Top 25 nodes with high BC and their respective  $k$  and CC

| Label | Name          | Degree    | Betweenness centrality | Closeness centrality |
|-------|---------------|-----------|------------------------|----------------------|
| 1     | PCK1          | 7         | 0.354489853            | 0.384615385          |
| 2     | ITPA          | 13        | 0.181820962            | 0.250000000          |
| 3     | <b>CREBBP</b> | <b>24</b> | <b>0.163843625</b>     | <b>0.452674897</b>   |
| 4*    | <b>JUN</b>    | <b>43</b> | <b>0.138335165</b>     | <b>0.436507937</b>   |
| 5     | PKLR          | 6         | 0.135446205            | 0.309859155          |
| 6     | PKM           | 6         | 0.135446205            | 0.309859155          |
| 7     | EP300         | 23        | 0.129821489            | 0.443548387          |
| 8     | CREB1         | 17        | 0.128192989            | 0.433070866          |
| 9     | <b>MAPK14</b> | <b>32</b> | <b>0.083166142</b>     | <b>0.433070866</b>   |
| 10    | <b>RELA</b>   | <b>25</b> | <b>0.069572515</b>     | <b>0.421455939</b>   |
| 11    | FOS           | 26        | 0.059760577            | 0.415094340          |
| 12    | LCK           | 26        | 0.058523406            | 0.371621622          |
| 13    | CSK           | 16        | 0.056993119            | 0.385964912          |
| 14    | MAPK1         | 25        | 0.046624799            | 0.423076923          |
| 15    | MAPK8         | 22        | 0.044774657            | 0.418250951          |
| 16*   | RASA1         | 21        | 0.037173088            | 0.351437700          |
| 17    | HLA-DRB1      | 10        | 0.036399507            | 0.332326284          |
| 18*   | ENO2          | 8         | 0.035223798            | 0.299727520          |
| 19    | ENO3          | 8         | 0.035223798            | 0.299727520          |
| 20    | SHC1          | 18        | 0.030403520            | 0.390070922          |
| 21    | HRAS          | 22        | 0.027715087            | 0.358306189          |
| 22    | PDHA1         | 6         | 0.026549903            | 0.241758242          |
| 23    | PDHB          | 6         | 0.026549903            | 0.241758242          |
| 24*   | CEBPB         | 15        | 0.023990476            | 0.384615385          |
| 25    | SRC           | 21        | 0.023429190            | 0.360655738          |

Note: The bold ones have both large degree and high BC

The asterisk ones are the seed proteins (4 nodes: JUN, RASA1, ENO2, CEBPB)

Table S8. The proteins in the backbone network (with co-expression)

| Label   | Name          | Description                                                      | Degree     | Betweenness centrality |
|---------|---------------|------------------------------------------------------------------|------------|------------------------|
| 1       | <b>JUN</b>    | Jun proto-oncogene                                               | 38         | .120966583             |
| 2       | <b>MAPK14</b> | Mitogen-activated protein kinase 14                              | 27         | .059088263             |
| 3       | <b>FOS</b>    | FBJ murine osteosarcoma viral oncogene homolog                   | 24         | .194660537             |
| 4       | <b>EP300</b>  | E1A binding protein p300                                         | 23         | .169481630             |
| 5       | <b>RELA</b>   | V-rel reticuloendotheliosis viral oncogene homolog A (avian)     | 22         | .084060558             |
| 6       | <b>ATF2</b>   | Activating transcription factor 2                                | 22         | .025940031             |
| 7       | <b>CREBBP</b> | CREB binding protein                                             | 22         | .119716044             |
| 8       | <b>MAPK8</b>  | Mitogen-activated protein kinase 8                               | 21         | .049177394             |
| 9       | <b>MAPK1</b>  | Mitogen-activated protein kinase 1                               | 18         | .040309594             |
| 10      | SP1           | Sp1 transcription factor                                         | 17         | .009311159             |
| 11      | ESR1          | Estrogen receptor 1                                              | 16         | .136690750             |
| 12      | <b>ITPA</b>   | Inosine triphosphatase (nucleoside triphosphate pyrophosphatase) | 15         | .238968585             |
| 13      | <b>PKM</b>    | Pyruvate kinase, muscle                                          | 10         | .163451120             |
| 14      | <b>PKLR</b>   | Pyruvate kinase, liver and RBC                                   | 10         | .163451120             |
| 15      | HLA-DRB1      | Major histocompatibility complex, class II, DR beta 1            | 10         | .151674014             |
| 16      | <b>PCK1</b>   | Phosphoenolpyruvate carboxykinase 1 (soluble)                    | 7          | .322721318             |
| Average |               |                                                                  | 18.88±7.80 | 0.128104±0.083565      |

Note: The bold ones are both in the backbone networks with and without co-expression setting in the STRING

Table S9. The proteins in the 2<sup>nd</sup> extended PPI network (with co-expression) involved in the KEGG pathways of alcoholism, amphetamine addiction, and cocaine addiction

| KEGG pathway | Name   | Description                                                          |
|--------------|--------|----------------------------------------------------------------------|
| Alcoholism   | ATF2   | Activating transcription factor 2                                    |
| Alcoholism   | BRAF   | V-raf murine sarcoma viral oncogene homolog B1                       |
| Alcoholism   | CREB5  | cAMP responsive element binding protein 5                            |
| Alcoholism   | FOSB   | cAMP responsive element binding protein 1                            |
| Alcoholism   | HDAC2  | Histone deacetylase 2                                                |
| Alcoholism   | HDAC6  | Histone deacetylase 6                                                |
| Alcoholism   | MAP2K1 | Mitogen-activated protein kinase kinase 1                            |
| Alcoholism   | MAPK1  | Mitogen-activated protein kinase 1                                   |
| Alcoholism   | MAPK3  | Mitogen-activated protein kinase 3                                   |
| Alcoholism   | RAF1   | V-raf-1 murine leukemia viral oncogene homolog 1                     |
|              |        |                                                                      |
| Amphetamine  | ATF2   | Activating transcription factor 2                                    |
| Amphetamine  | CREB5  | cAMP responsive element binding protein 5                            |
| Amphetamine  | FOS    | FBJ murine osteosarcoma viral oncogene homolog                       |
| Amphetamine  | FOSB   | FBJ murine osteosarcoma viral oncogene homolog B                     |
| Amphetamine  | JUN    | Jun proto-oncogene                                                   |
|              |        |                                                                      |
| Cocaine      | ATF2   | Activating transcription factor 2                                    |
| Cocaine      | CREB5  | cAMP responsive element binding protein 5                            |
| Cocaine      | FOSB   | FBJ murine osteosarcoma viral oncogene homolog B                     |
| Cocaine      | JUN    | Jun proto-oncogene                                                   |
| Cocaine      | NFKB1  | Nuclear factor of kappa light polypeptide gene enhancer in B-cells 1 |
| Cocaine      | RELA   | V-rel reticuloendotheliosis viral oncogene homolog A (avian)         |



Table S10. The miRNA targeting genes by stress-induced

| Gene Name | Description                                                | Stress-induced differentially expressed miRNA                                            |
|-----------|------------------------------------------------------------|------------------------------------------------------------------------------------------|
| FOS       | FBJ murine osteosarcoma viral oncogene homolog             | miR-221, miR-29a                                                                         |
| JUN       | jun proto-oncogene                                         | miR-15b, miR-30a                                                                         |
| MAPK1     | mitogen-activated protein kinase 1                         | miR-124, miR-132, miR-15b, miR-106b, miR-186, miR-19a, miR-204, miR-26a, miR-410, miR-32 |
| MAPK14    | mitogen-activated protein kinase 14                        | miR-124, miR-351, miR-19a, miR-22                                                        |
| RELA      | v-rel avian reticuloendotheliosis viral oncogene homolog A | miR-124                                                                                  |

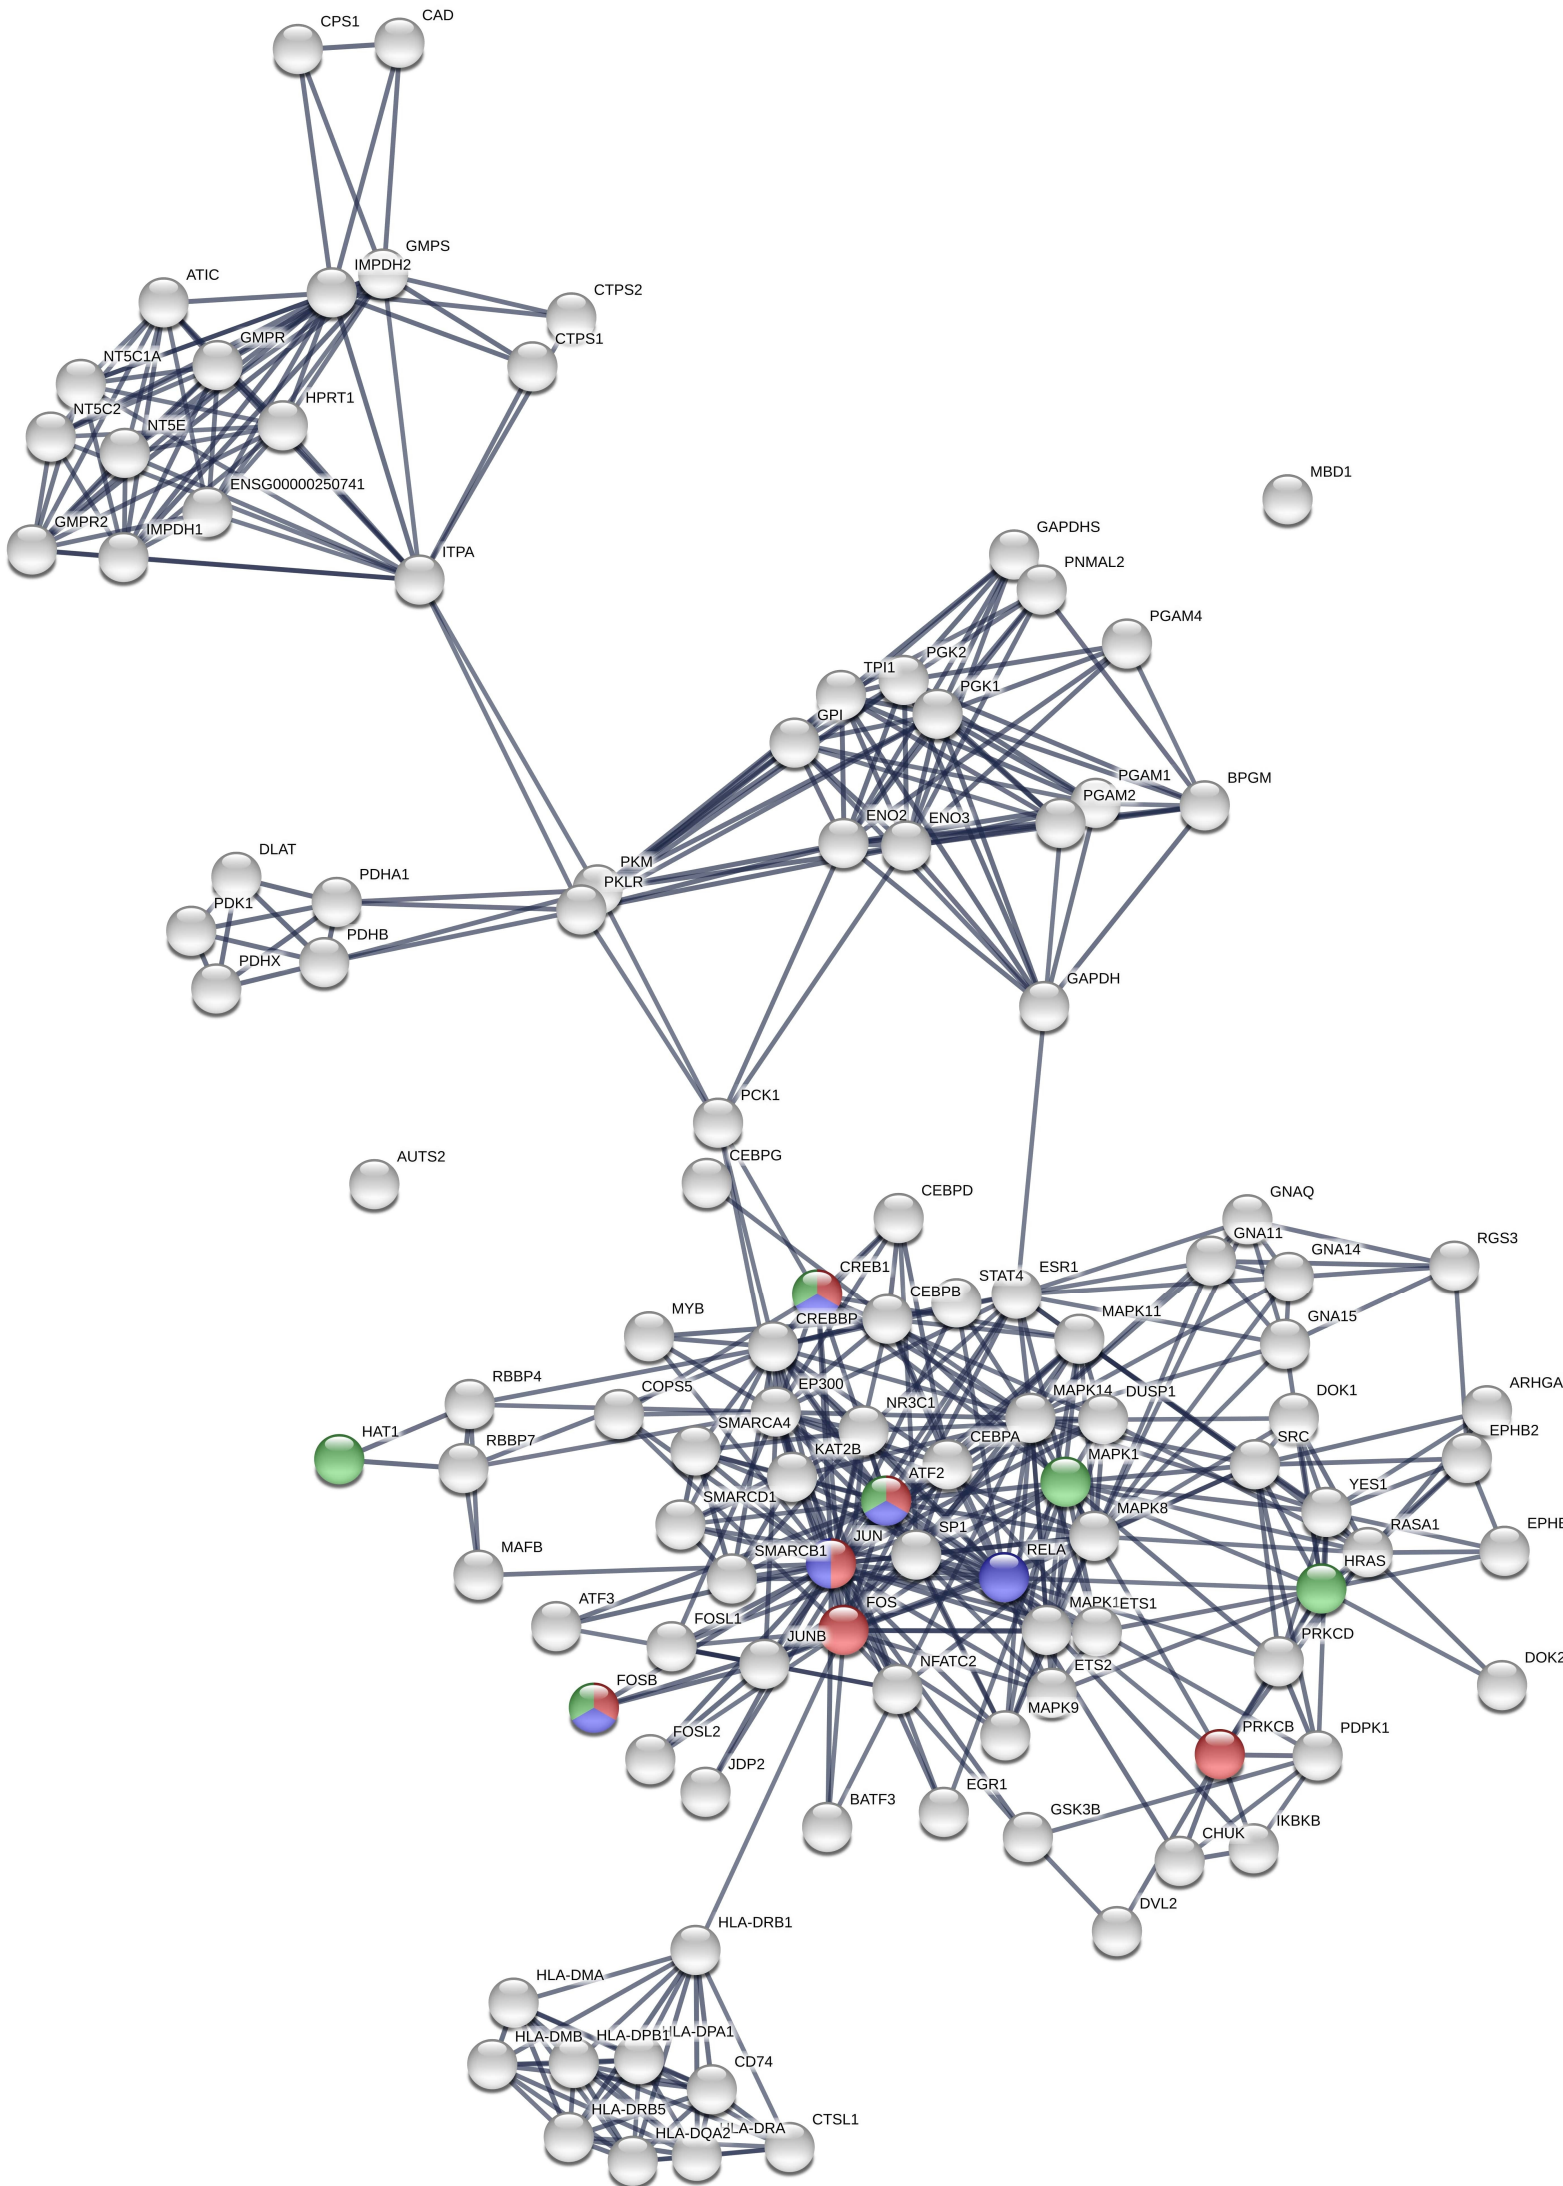

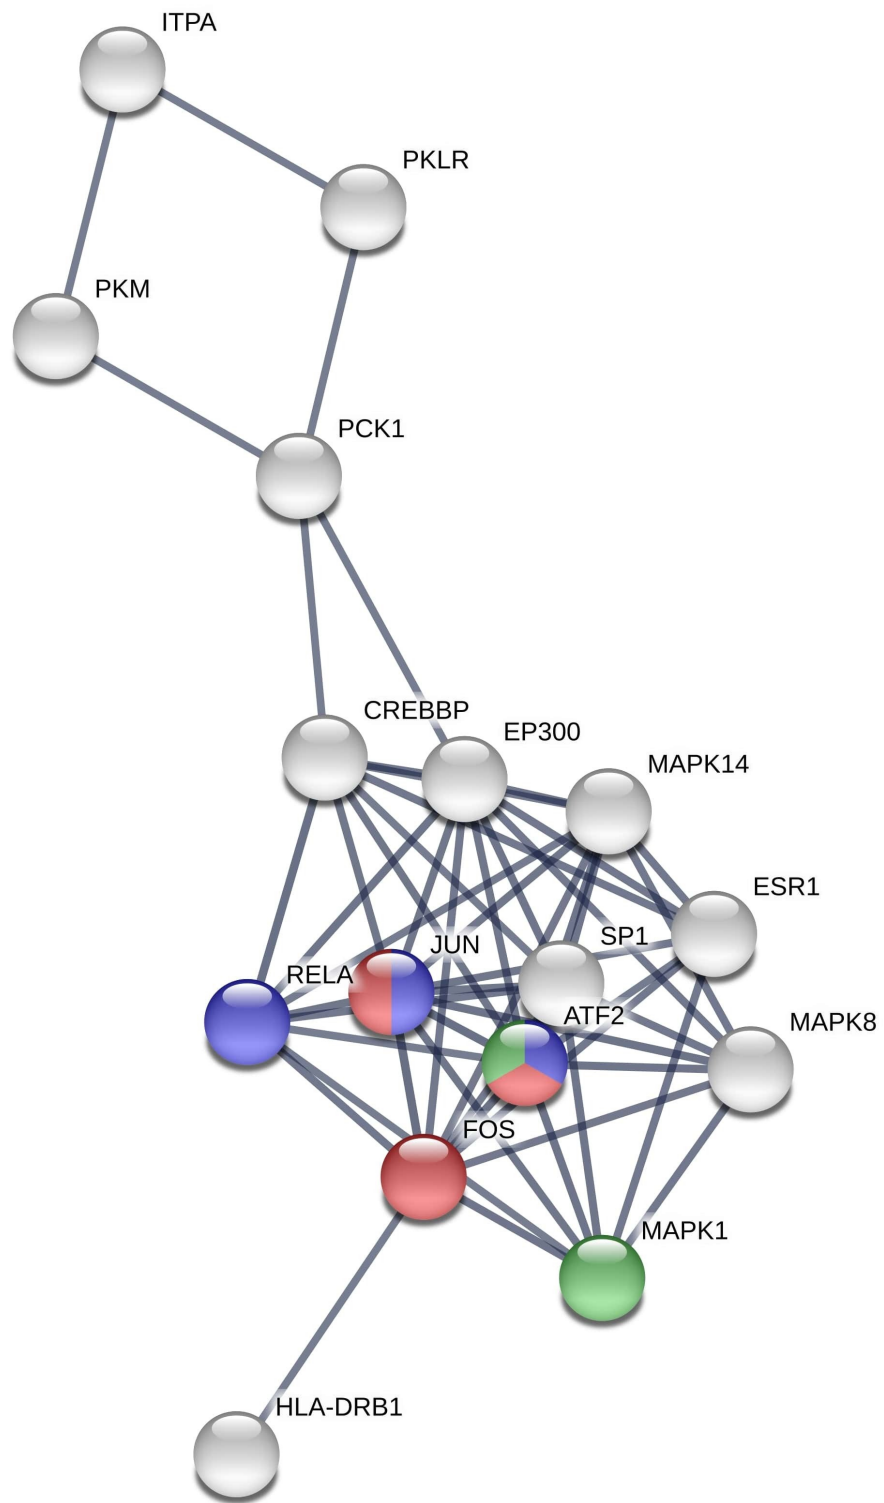

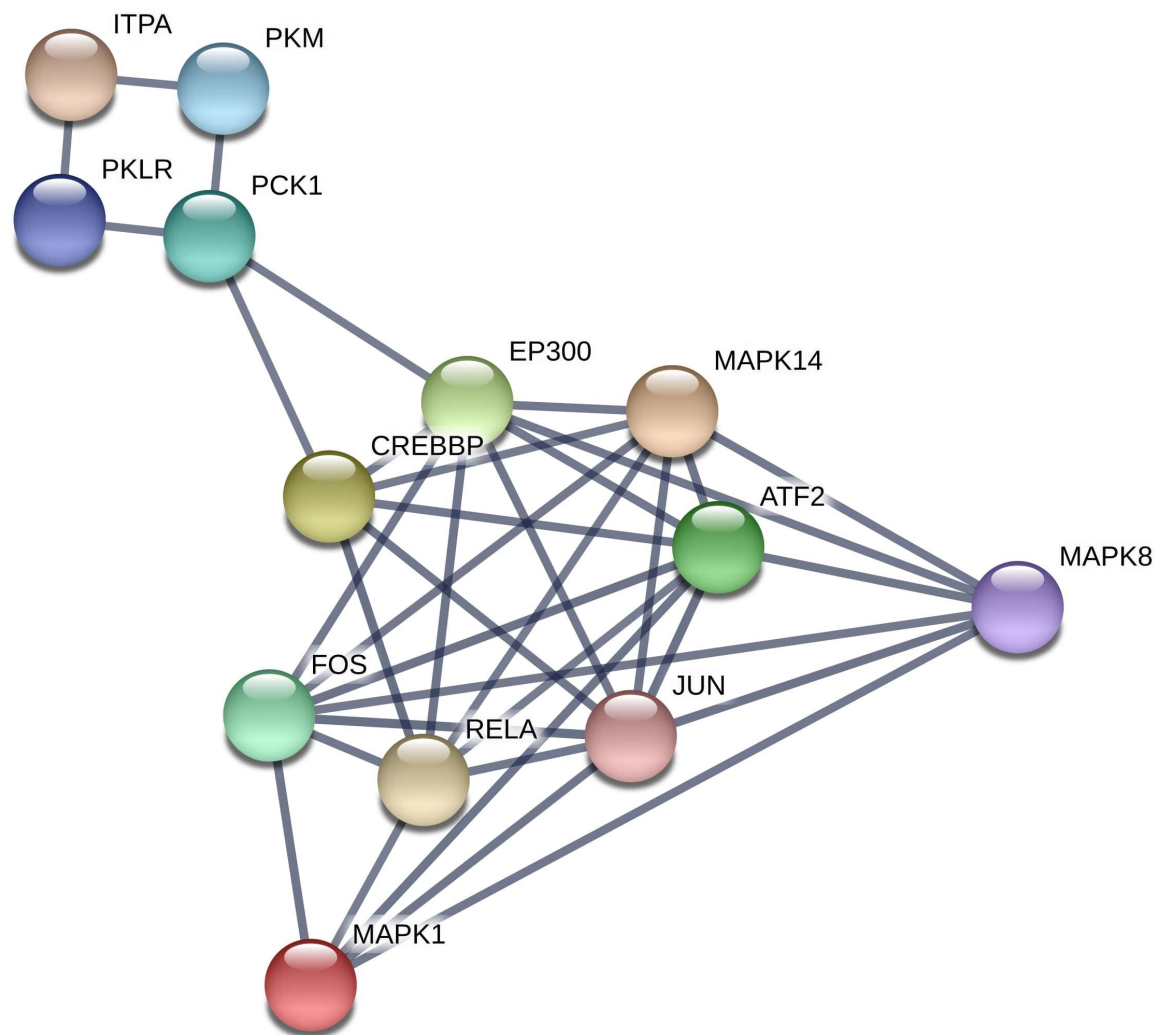

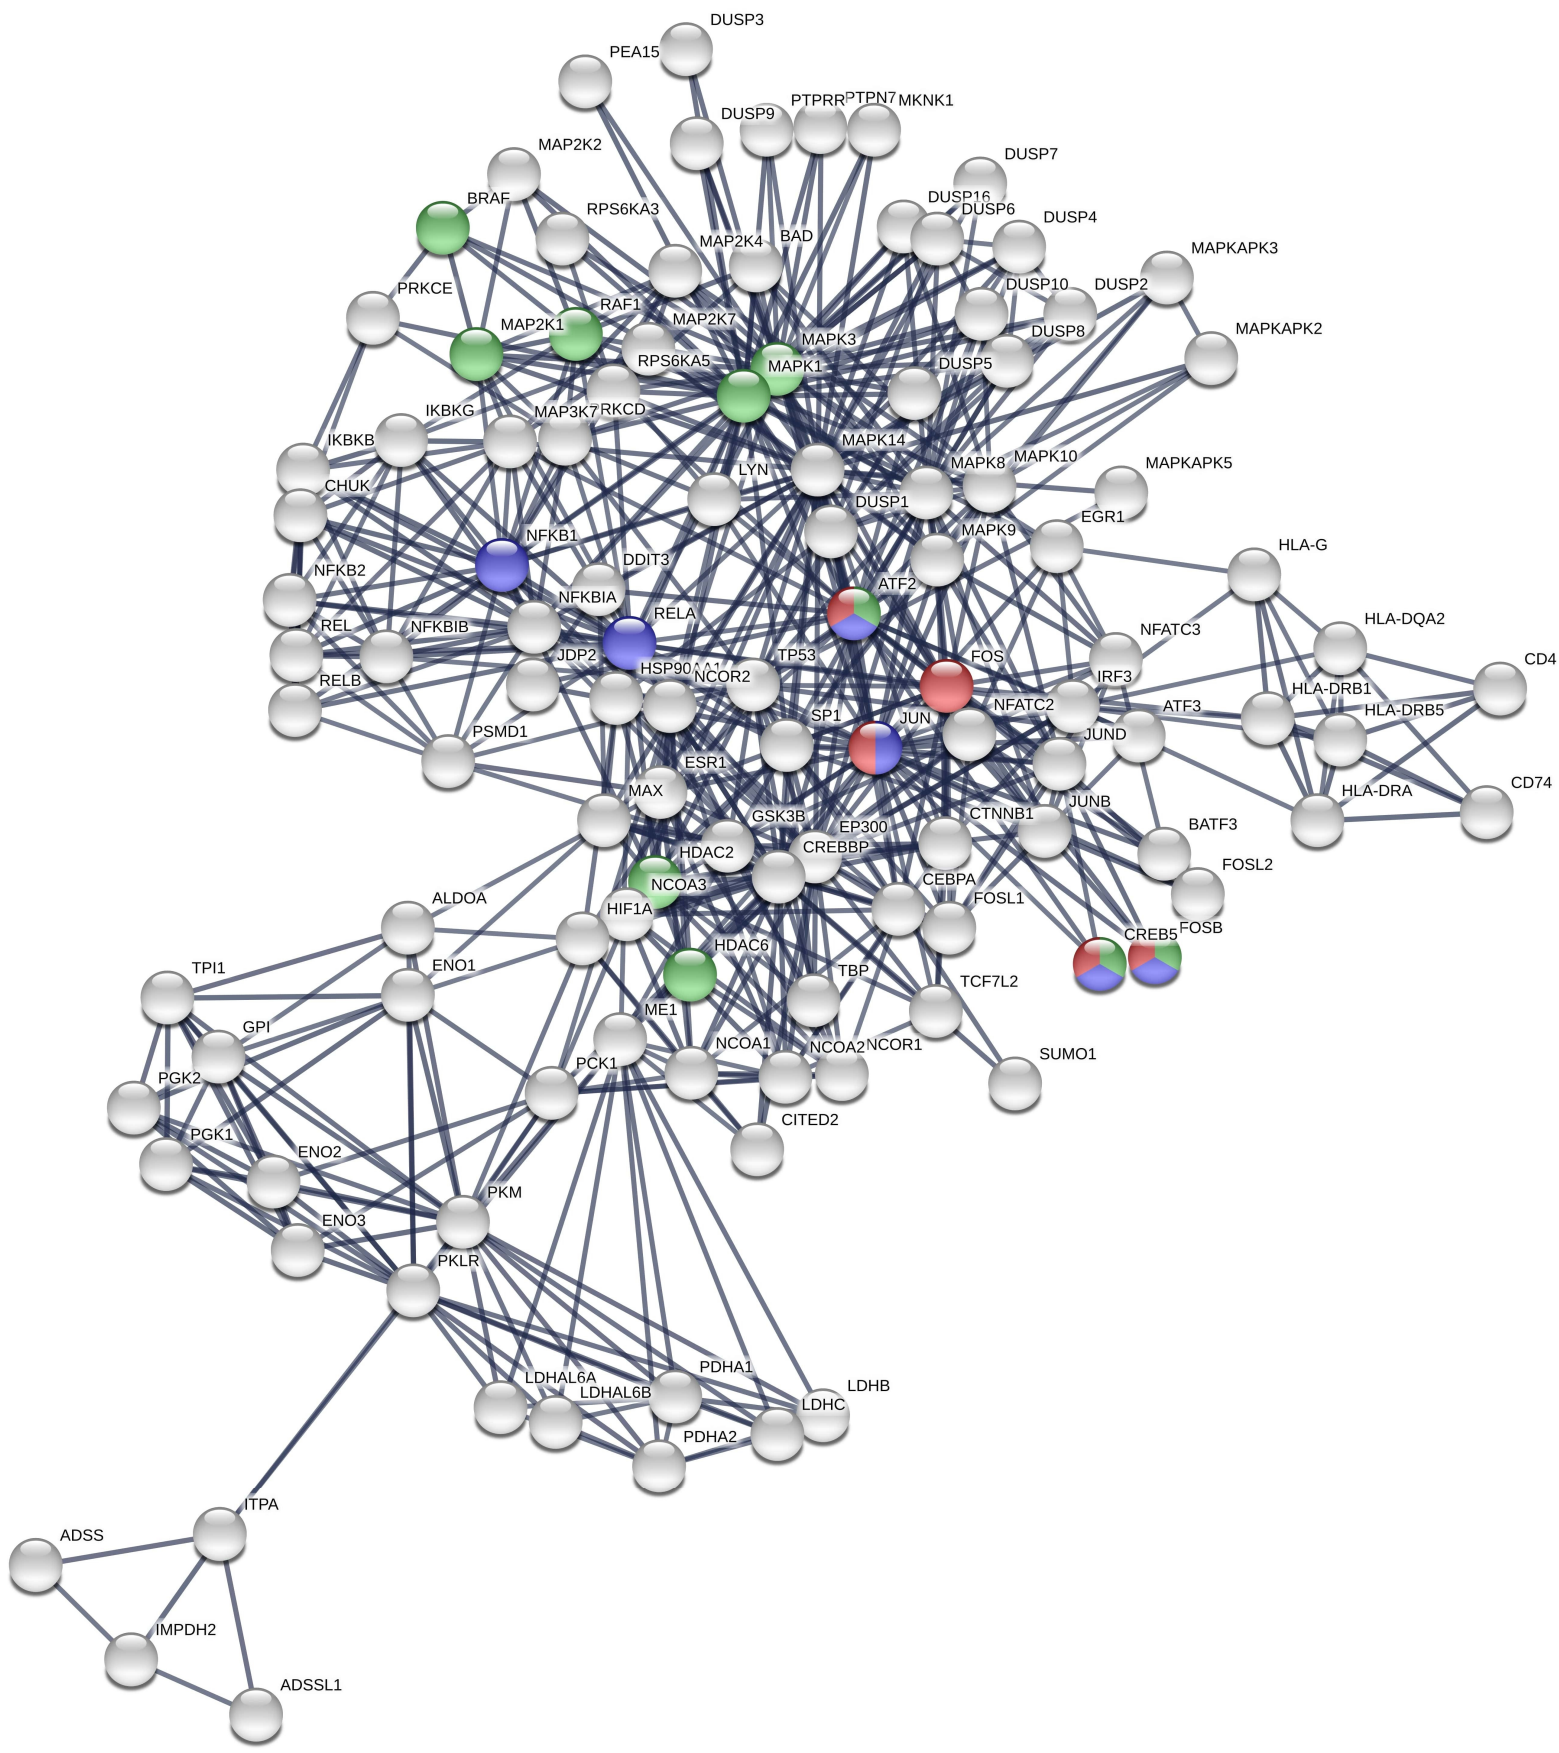



**ALCOHOLISM**

**Dopaminergic synapse**

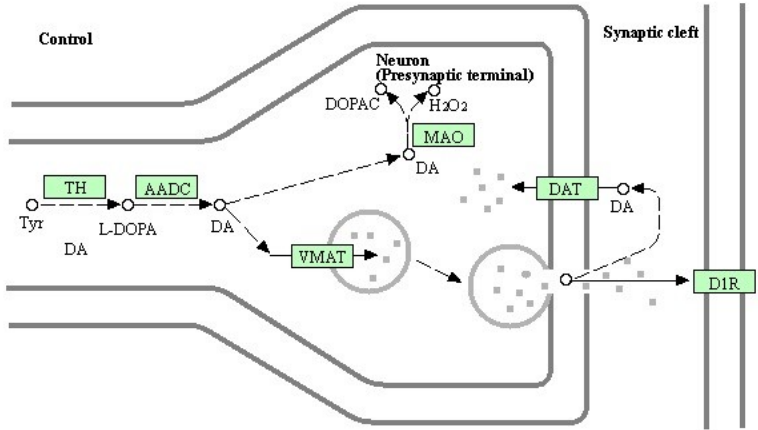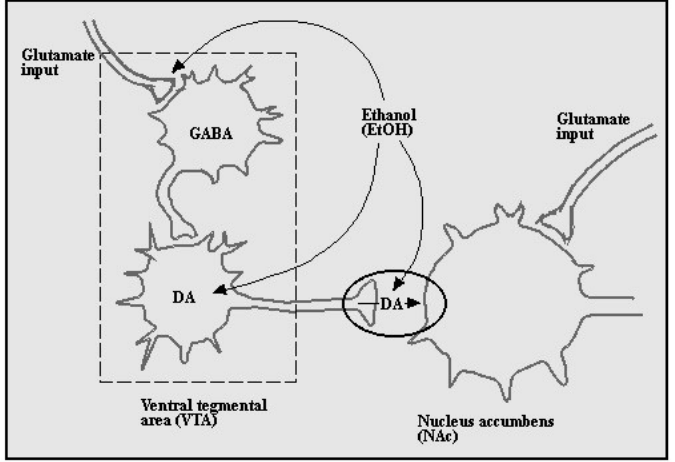

**Acute ethanol**

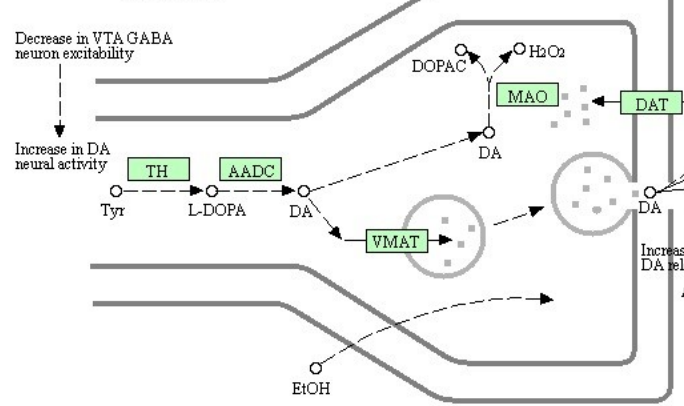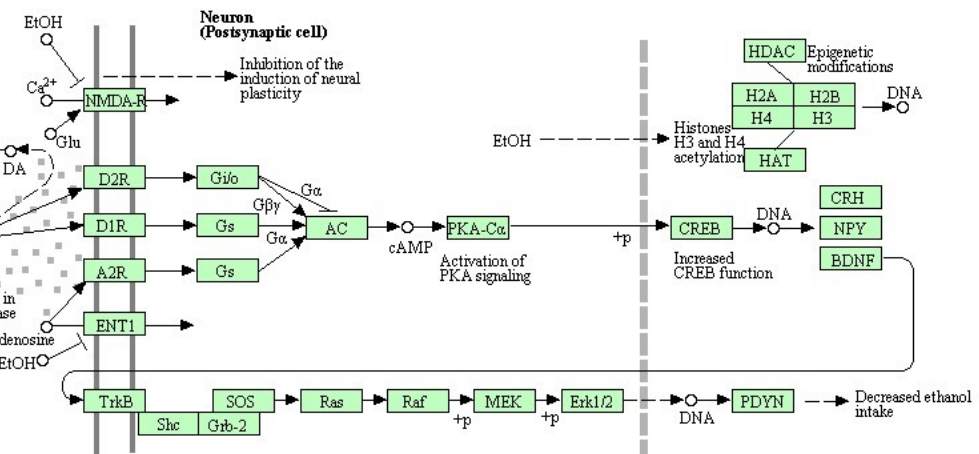

**Chronic ethanol**

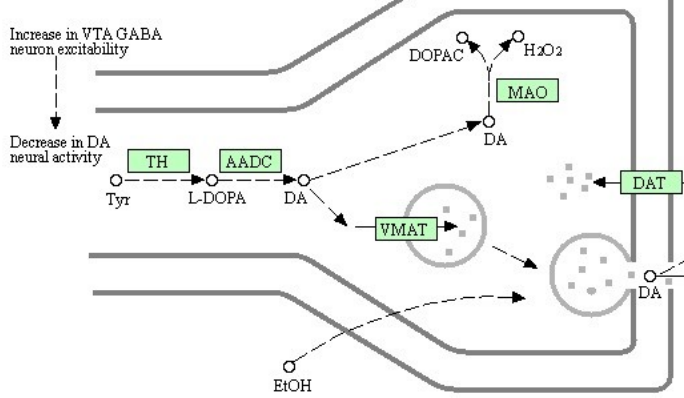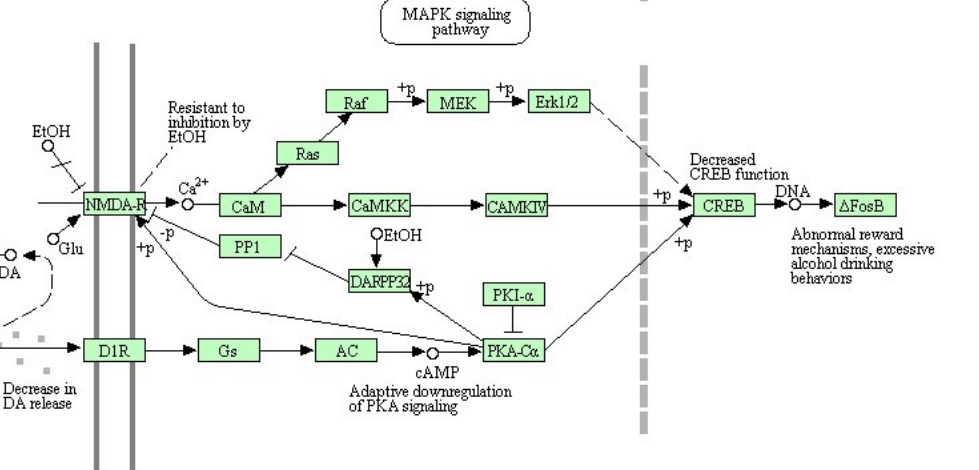

**ALCOHOLISM**

**Dopaminergic synapse**

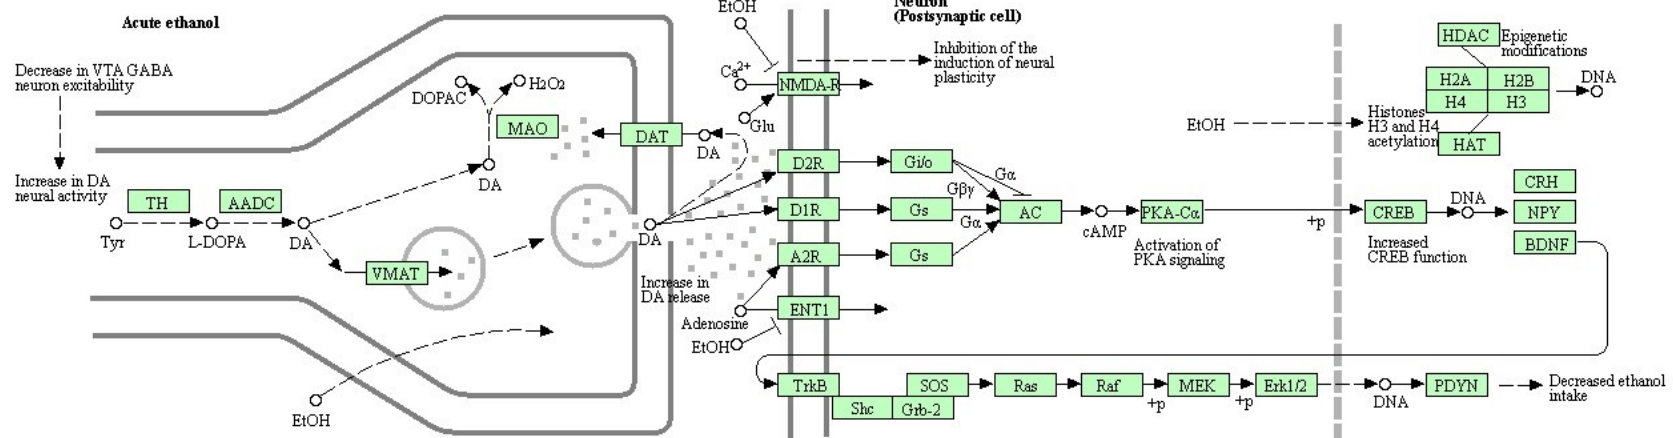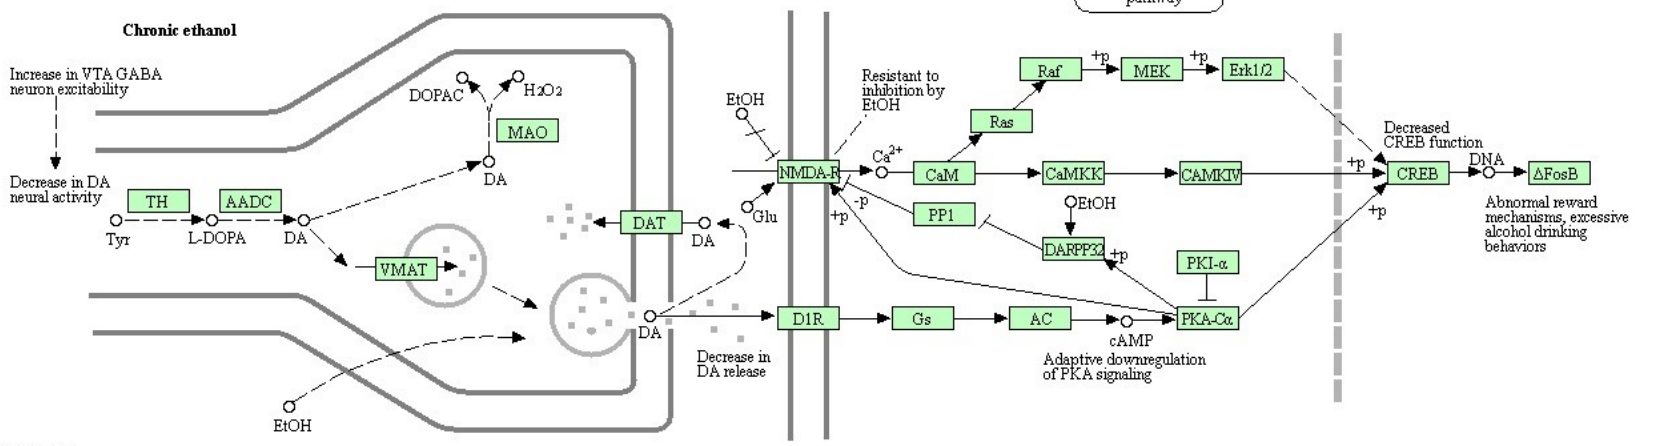

AMPHETAMINE ADDICTION

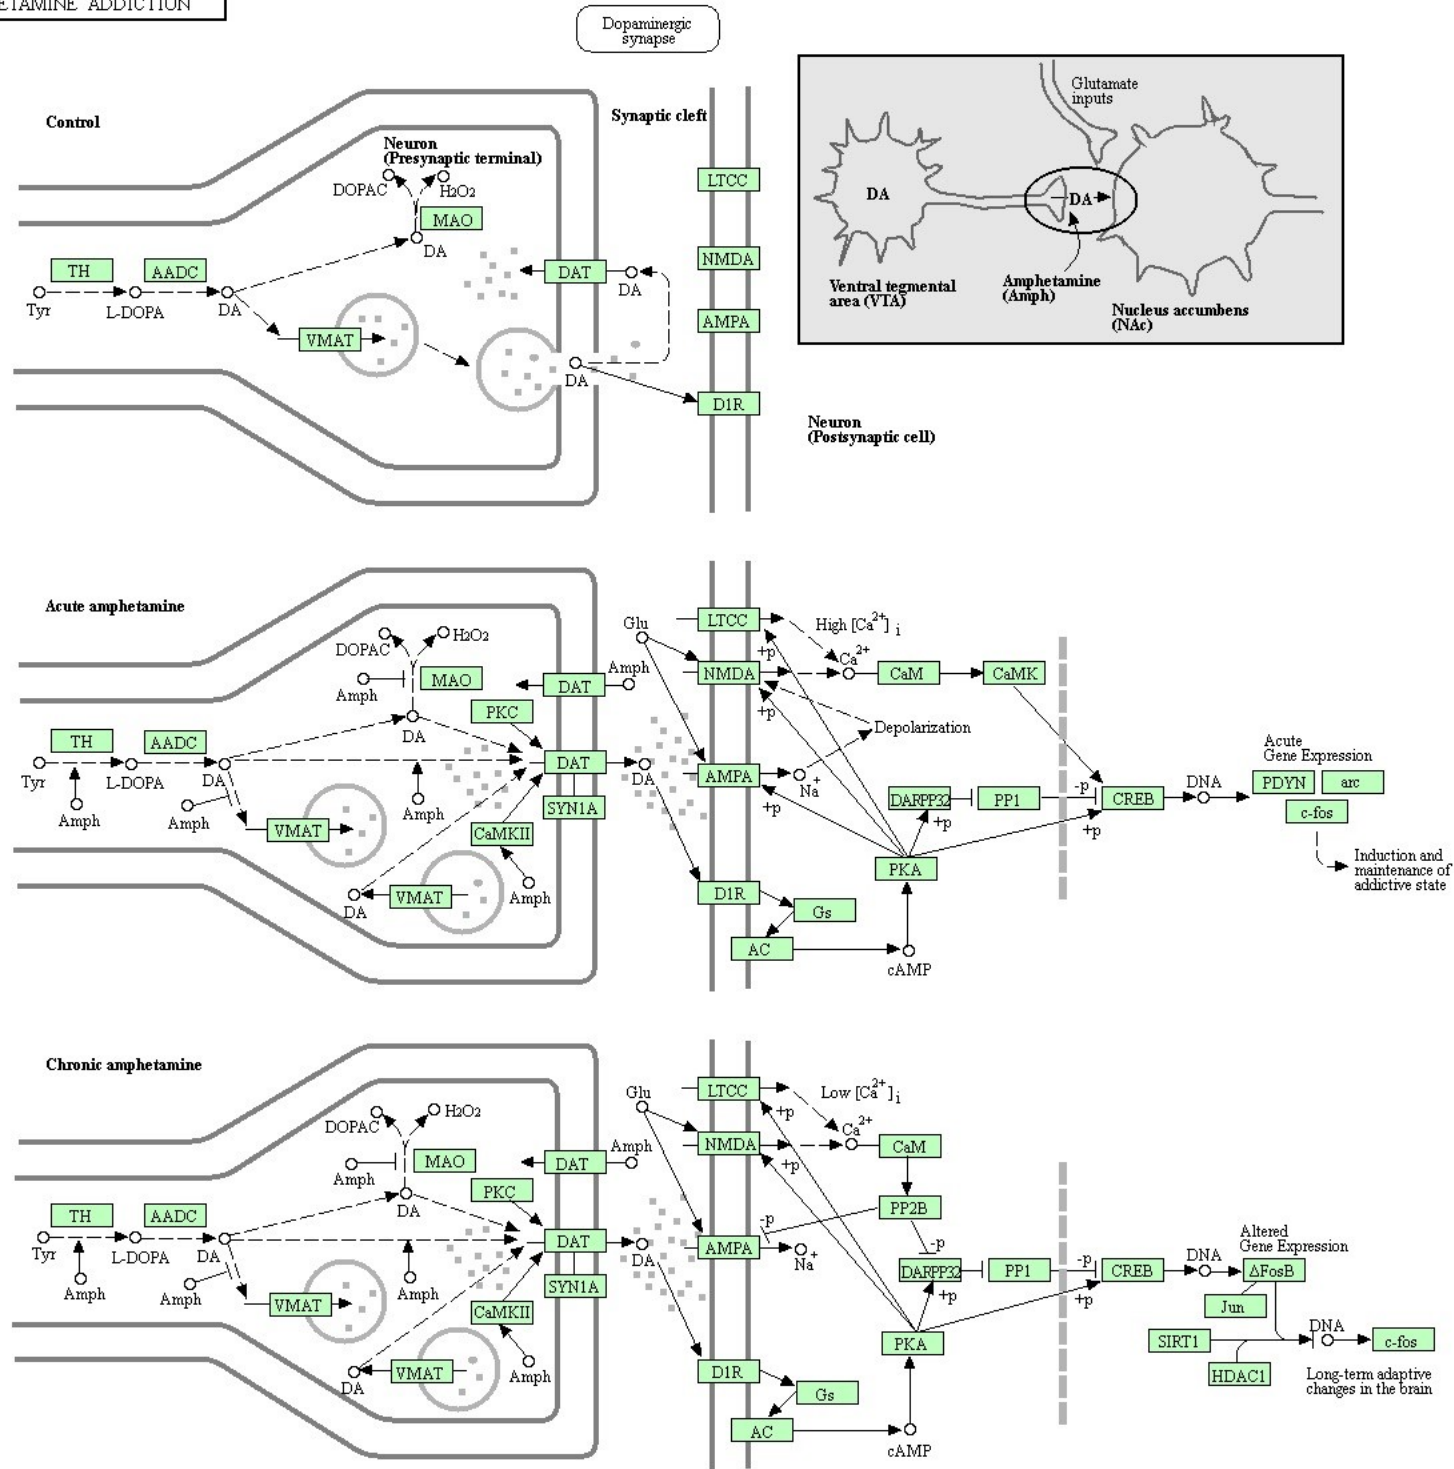

Supplement: 41598_2019_41552_MOESM1_ESM.pdf [file 41598_2019_41552_MOESM1_ESM.pdf]
